# Supplementary material for: Value of Left Atrial Strain in Predicting Recurrence after Atrial Fibrillation Ablation
Source: MDPI journal article supplement (doi:10.3390/jcm12124034), 2023-06-13
Supplement: s1 [file s1]

Supplementary material

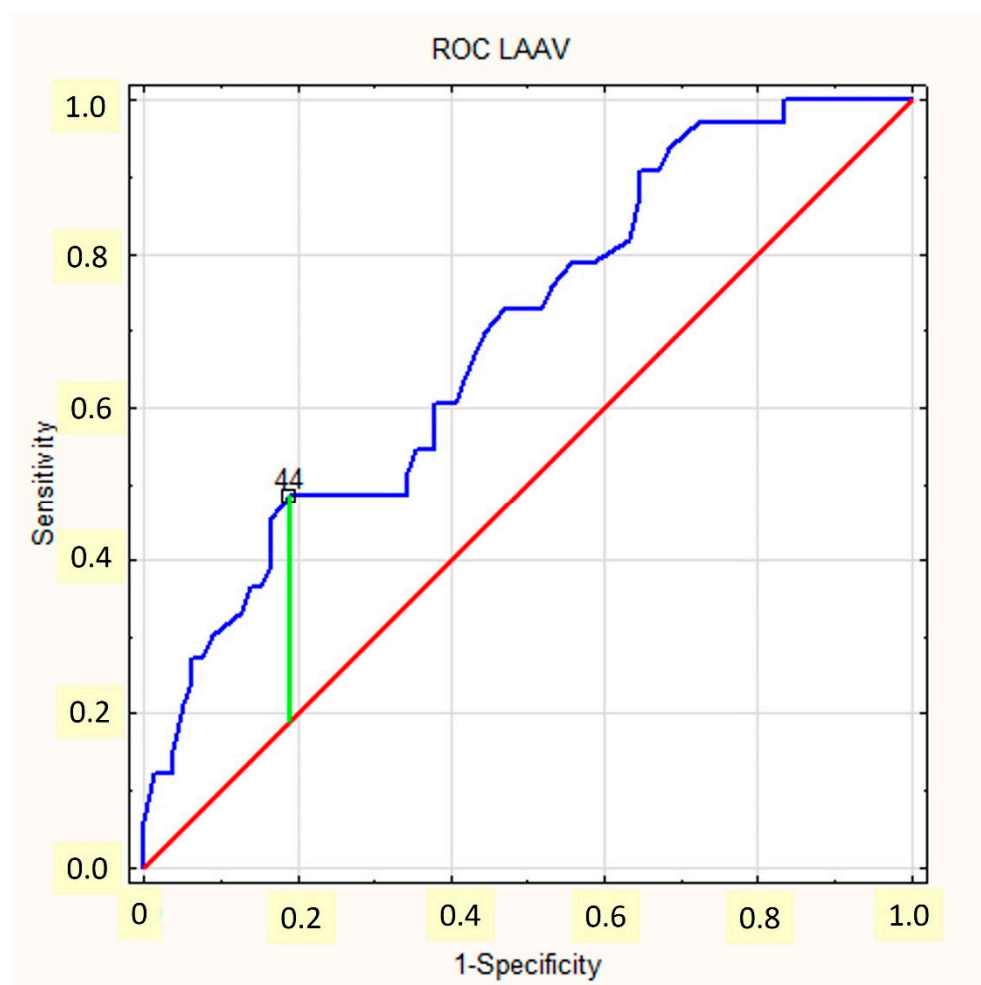

**Figure S1.** ROC statistics for left atrial appendage emptying velocity (LAHV, sinus rhythm patients only). AUC=0.69.

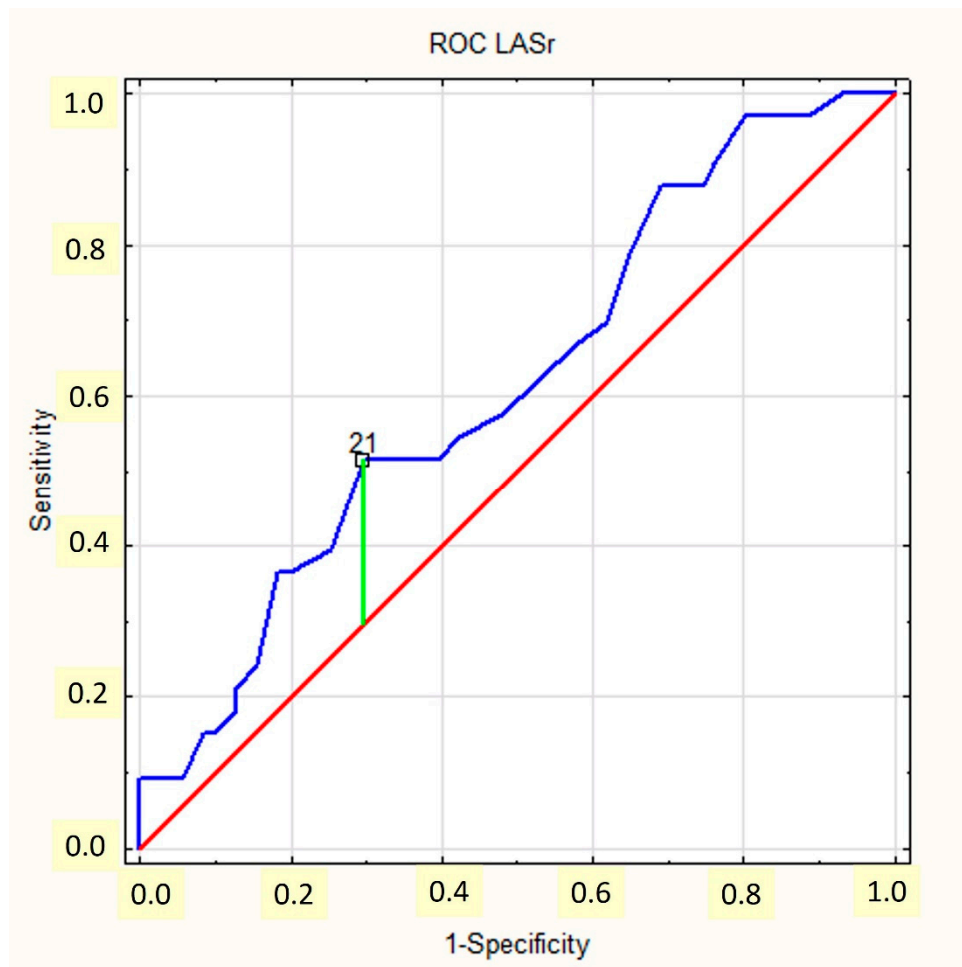

**Figure S2.** ROC statistics for left atrial reservoir strain (LASr, sinus rhythm patients only). AUC=0.62.
